# Supplementary material for: C8N12O10: a promising energetic compound with excellent detonation performance and desirable sensitivity
Source: Royal Society of Chemistry journal article supplement (doi:10.1039/c9nj00955h), 2019-01-01
Supplement: c9nj00955h1.pdf [file c9nj00955h1.pdf]

*New Journal of Chemistry*

Supporting Information

**C<sub>8</sub>N<sub>12</sub>O<sub>10</sub>: A Promising Energetic Compound with Excellent  
Detonation Performance and Desirable Sensitivity**

Hualin Xiong<sup>a</sup>, Guangbin Cheng<sup>a</sup>, Zaichao Zhang<sup>b</sup> and Hongwei Yang<sup>a\*</sup>

School of Chemical Engineering, Nanjing University of Science and Technology Nanjing 210094, P. R. China

**Email: [hyang@mail.njust.edu.cn](mailto:hyang@mail.njust.edu.cn)**

## Table of Contents

|                                                     |     |
|-----------------------------------------------------|-----|
| 1. Computational Details.....                       | 1   |
| 2. Crystallographic data for compounds 5 and 6..... | 1-3 |
| 3. Spectrums of compound 5 and 6.....               | 4-7 |
| 4. Reference.....                                   | 8   |

## 1. Computational Details

The geometric optimization, frequency analysis and single-point energies were accomplished by using Gaussian 09 package at the B3LYP 6-311+G\*\* level.<sup>1-4</sup> All of the optimized structures were characterized to be local energy minima on the potential surface without any imaginary frequencies. Atomization energies were calculated by the CBS-4M.<sup>5</sup> All the optimized structures were characterized to be true local energy minima on the potential-energy surface without imaginary frequencies.

The predictions of heats of formation (HOF) of compounds through designed isodesmic reactions. The isodesmic reaction processes, that is, the number of each kind of formal bond is conserved, were used with the application of the bond separation reaction (BSR) rules. The molecule was broken down into a set of two heavy-atom molecules containing the same component bonds. The isodesmic reactions used to derive the HOF of neutral compounds **5** and **6** are shown in Scheme S1.

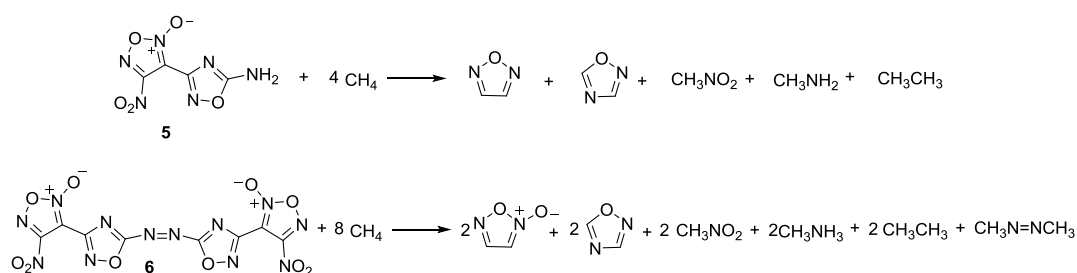

**Scheme S1.** The isodesmic reactions for calculating heat of formation for **5** and **6**

**Table S1.** Calculated zero-point energy (ZPE), thermal correction to enthalpy ( $H_T$ ), total energy ( $E_0$ ) and heats of formation (HOF)

| Compound                           | $E_0$ / a. u | ZPE / kJ mol <sup>-1</sup> | $\Delta H_T$ / kJ mol <sup>-1</sup> | HOF/kJ mol <sup>-1</sup> |
|------------------------------------|--------------|----------------------------|-------------------------------------|--------------------------|
| <b>5</b>                           | -858.1683916 | 239.37                     | 35.47                               | 411.66                   |
| <b>6</b>                           | -1713.817052 | 366.40                     | 66.50                               | 1188.78                  |
| CH <sub>4</sub>                    | -40.5339263  | 112.26                     | 10.04                               | -74.60                   |
| furazan                            | -262.1183629 | 114.62                     | 11.84                               | 215.72                   |
| furoxan                            | -337.3042877 | 124.09                     | 14.34                               | 224.73                   |
| 1,2,4-oxadiazole                   | -262.1529348 | 116.90                     | 11.67                               | 99.80                    |
| CH <sub>3</sub> N=NCH <sub>3</sub> | -189.3337358 | 211.85                     | 16.32                               | 147.85                   |
| CH <sub>3</sub> NO <sub>2</sub>    | -245.0915559 | 124.93                     | 11.60                               | -80.80                   |
| CH <sub>3</sub> CH <sub>3</sub>    | -79.8565413  | 187.31                     | 11.79                               | -84.01                   |

## 2. Crystallographic data for **5** and **6**

**Table S2** Crystallographic data for **5** and **6**

| empirical formula | C <sub>4</sub> H <sub>2</sub> N <sub>6</sub> O <sub>5</sub> | C <sub>8</sub> N <sub>12</sub> O <sub>10</sub> |
|-------------------|-------------------------------------------------------------|------------------------------------------------|
| formula weight    | 214.12                                                      | 424.20                                         |
| temperature/K     | 173(2)                                                      | 173(2)                                         |
| crystal system    | monoclinic                                                  | monoclinic                                     |
| space group       | P2 <sub>1</sub> /c                                          | P2 <sub>1</sub> /c                             |
| a/Å               | 6.0977(4)                                                   | 11.2116(12)                                    |
| b/Å               | 8.2774(6)                                                   | 5.9944(8)                                      |
| c/Å               | 15.1568(10)                                                 | 10.8652(11)                                    |
| $\alpha$ /°       | 90                                                          | 90                                             |
| $\beta$ /°        | 97.006(3)                                                   | 95.429(4)                                      |

|                                         |                          |                                        |
|-----------------------------------------|--------------------------|----------------------------------------|
| $\gamma/^\circ$                         | 90                       | 90                                     |
| Volume/ $\text{\AA}^3$                  | 759.30(9)                | 726.94(14)                             |
| Z                                       | 4                        | 2                                      |
| $\rho_{\text{calc}}$ mg/mm <sup>3</sup> | 1.873                    | 1.938                                  |
| m/mm <sup>-1</sup>                      | 0.172                    | 0.179                                  |
| $F(000)$                                | 432.0                    | 424.0                                  |
| Crystal size/mm <sup>3</sup>            | 0.25×0.21×0.18           | 0.32×0.23×0.04                         |
| 2 $\theta$ range for data collection    | 5.618 to 50.81°          | 7.302 to 50.926°                       |
| Index ranges                            | -7≤h≤7, -9≤k≤9, -18≤l≤17 | -13 ≤ h ≤ 13, -7 ≤ k ≤ 6, -13 ≤ l ≤ 12 |
| Reflections collected                   | 6683                     | 5466                                   |
| Independent reflections                 | 1397[R(int) = 0.0495 ]   | 1330[R(int) = 0.0555]                  |
| Data/restraints/parameters              | 1397/0/142               | 1330/0/136                             |
| Goodness-of-fit on $F^2$                | 1.043                    | 1.051                                  |
| Final R indexes [ $I \geq 2\sigma(I)$ ] | 0.0363, 0.0749           | 0.0525, 0.1299                         |
| Final R indexes [all data]              | 0.0590, 0.0831           | 0.0764, 0.1349                         |
| CCDC                                    | 1572565                  | 1850981                                |

**Table S3** Selected bond lengths [ $\text{\AA}$ ] and angles [ $^\circ$ ] for compound **5**

|                |            |                  |            |
|----------------|------------|------------------|------------|
| C(1)-C(2)      | 1.411(3)   | N(1)-O(2)        | 1.215(2)   |
| C(1)-C(3)      | 1.455(3)   | N(2)-O(1)        | 1.367(2)   |
| C(1)-N(1)      | 1.331(2)   | N(3)-O(3)        | 1.431(2)   |
| C(2)-N(2)      | 1.293(2)   | N(5)-H(5A)       | 0.84(2)    |
| C(2)-N(6)      | 1.458(2)   | N(5)-H(5B)       | 0.86(2)    |
| C(3)-N(3)      | 1.302(3)   | N(6)-O(4)        | 1.214(2)   |
| C(3)-N(4)      | 1.361(2)   | N(6)-O(5)        | 1.213(2)   |
| C(4)-N(4)      | 1.316(2)   | C(2)-C(1)-C(3)   | 132.24(18) |
| C(4)-N(5)      | 1.310(2)   | N(1)-C(1)-C(2)   | 104.77(16) |
| C(4)-O(3)      | 1.348(2)   | N(1)-C(1)-C(3)   | 122.96(17) |
| N(1)-O(1)      | 1.466(2)   | C(1)-C(2)-N(6)   | 127.84(17) |
| N(2)-C(2)-C(1) | 114.56(18) | C(2)-N(2)-O(1)   | 105.78(15) |
| N(2)-C(2)-N(6) | 117.31(16) | C(3)-N(3)-O(3)   | 101.53(14) |
| N(3)-C(3)-C(1) | 118.99(17) | C(4)-N(4)-C(3)   | 101.43(16) |
| N(3)-C(3)-N(4) | 117.44(17) | C(4)-N(5)-H(5A)  | 118.7(15)  |
| N(4)-C(3)-C(1) | 123.57(18) | C(4)-N(5)-H(5B)  | 119.2(15)  |
| N(4)-C(4)-O(3) | 113.19(16) | H(5A)-N(5)-H(5B) | 122(2)     |
| N(5)-C(4)-N(4) | 128.85(19) | O(4)-N(6)-C(2)   | 117.94(16) |
| N(5)-C(4)-O(3) | 117.96(17) | O(5)-N(6)-C(2)   | 115.80(16) |
| C(1)-N(1)-O(1) | 107.05(14) | O(5)-N(6)-O(4)   | 126.21(18) |
| O(2)-N(1)-C(1) | 136.26(16) | N(2)-O(1)-N(1)   | 107.84(12) |
| O(2)-N(1)-O(1) | 116.68(15) | C(4)-O(3)-N(3)   | 106.41(14) |

**Table S4.** Selected bond lengths [ $\text{\AA}$ ] and angles [ $^\circ$ ] for compound **6**

|                  |           |               |           |
|------------------|-----------|---------------|-----------|
| O1-N2            | 1.407(3)  | N2-C1         | 1.304(4)  |
| O1-C2            | 1.341(4)  | N3-C1         | 1.378(4)  |
| O2-N4            | 1.468(3)  | N3-C2         | 1.292(4)  |
| O2-N5            | 1.357(4)  | N4-C3         | 1.333(4)  |
| O3-N4            | 1.209(4)  | N5-C4         | 1.290(4)  |
| O4-N6            | 1.221(4)  | N6-C4         | 1.455(5)  |
| O5-N6            | 1.218(5)  | C1-C3         | 1.464(5)  |
| N1-C2            | 1.406(4)  | C3-C4         | 1.411(5)  |
| N1-N1_a          | 1.257(3)  | N2-C1-N3      | 115.5(3)  |
| N2 -O1-C2        | 105.5(2)  | N2-C1-C3      | 120.4(3)  |
| N4 -O2-N5        | 108.4(2)  | N3-C1-C3      | 124.0(3)  |
| N1_a-N1-C2       | 112.2(2)  | O1-C2-N1      | 121.1(3)  |
| O1 -N2-C1        | 103.1(2)  | O1-C2-N3      | 115.0(3)  |
| C1 -N3-C2        | 101.0(3)  | N1-C2-N3      | 123.9(3)  |
| O2 -N4-O3        | 118.0(2)  | N4-C3-C1      | 120.7(3)  |
| O2 -N4-C3        | 106.2(3)  | N4-C3-C4      | 105.3(3)  |
| O3 -N4-C3        | 135.8(3)  | C1-C3-C4      | 134.0(3)  |
| O2 -N5-C4        | 106.0(3)  | N5-C4-N6      | 118.6(3)  |
| O4 -N6-O5        | 126.3(3)  | N5-C4-C3      | 114.2(3)  |
| O4 -N6-C4        | 115.9(3)  | N6-C4-C3      | 127.0(3)  |
| O5 -N6-C4        | 117.7(3)  | O2 -N4-C3 -C1 | 176.8(3)  |
| N2 -O1-C2 -N3    | -0.1(4)   | O3 -N4-C3 -C4 | -179.4(3) |
| C2 -O1-N2 -C1    | 0.2(3)    | O3 -N4-C3 -C1 | -1.2(6)   |
| N2 -O1-C2 -N1    | -179.5(3) | O2 -N4-C3 -C4 | -1.4(3)   |
| N5 -O2-N4 -O3    | 179.9(3)  | O2 -N5-C4 -N6 | 174.9(3)  |
| N4 -O2-N5 -C4    | -0.9(3)   | O2 -N5-C4 -C3 | 0.0(4)    |
| N5 -O2-N4 -C3    | 1.5(3)    | O4 -N6-C4 -C3 | 21.8(5)   |
| N1_a-N1-C2 -O1   | -0.7(4)   | O5 -N6-C4 -C3 | -160.6(4) |
| C2 -N1-N1_a-C2_a | -180.0(3) | O4 -N6-C4 -N5 | -152.4(3) |
| N1_a-N1-C2 -N3   | 179.9(3)  | O5 -N6-C4 -N5 | 25.3(5)   |
| O1 -N2-C1 -N3    | -0.3(4)   | N2 -C1-C3 -C4 | -152.6(4) |
| O1 -N2-C1 -C3    | -177.7(3) | N2 -C1-C3 -N4 | 29.7(5)   |
| C1 -N3-C2 -N1    | 179.3(3)  | N3 -C1-C3 -C4 | 30.2(6)   |
| C2 -N3-C1 -C3    | 177.6(3)  | N3-C1-C3-N4   | -147.5(3) |
| C1 -N3-C2 -O1    | -0.1(4)   | C1-C3-C4-N6   | 8.7(6)    |
| C2 -N3-C1 -N2    | 0.3(4)    | N4-C3-C4-N5   | 1.0(4)    |
| N4-C3-C4-N6      | -173.4(3) | C1-C3-C4-N5   | -177.0(4) |

### 3. Spectrums of compounds 3-6

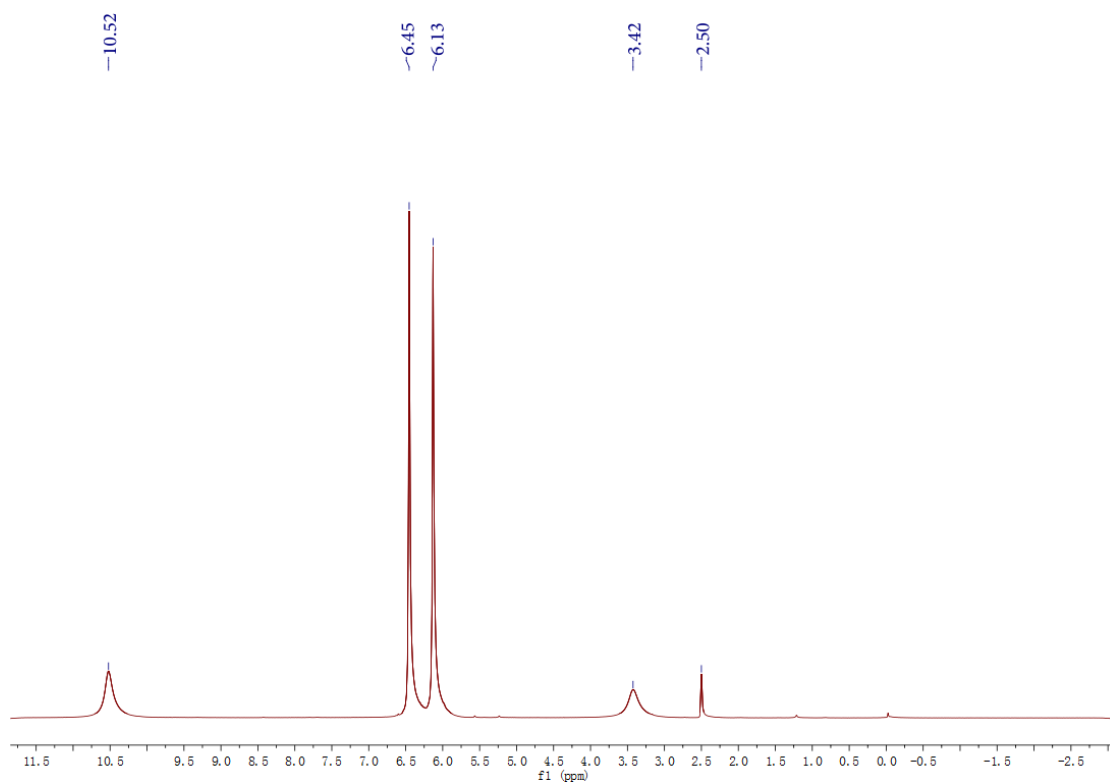

Figure S1.  $^1\text{H}$  NMR spectra in DMSO- $d_6$  for **3**.

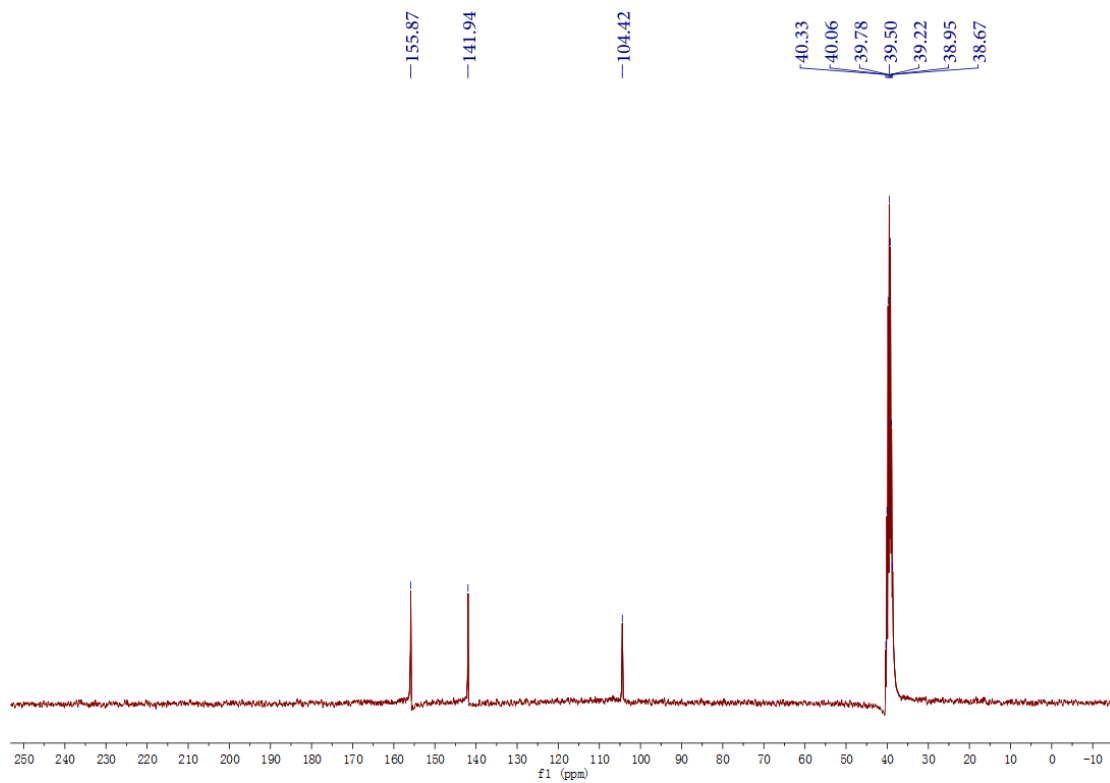

Figure S2.  $^{13}\text{C}$  NMR spectra in DMSO- $d_6$  for **3**.

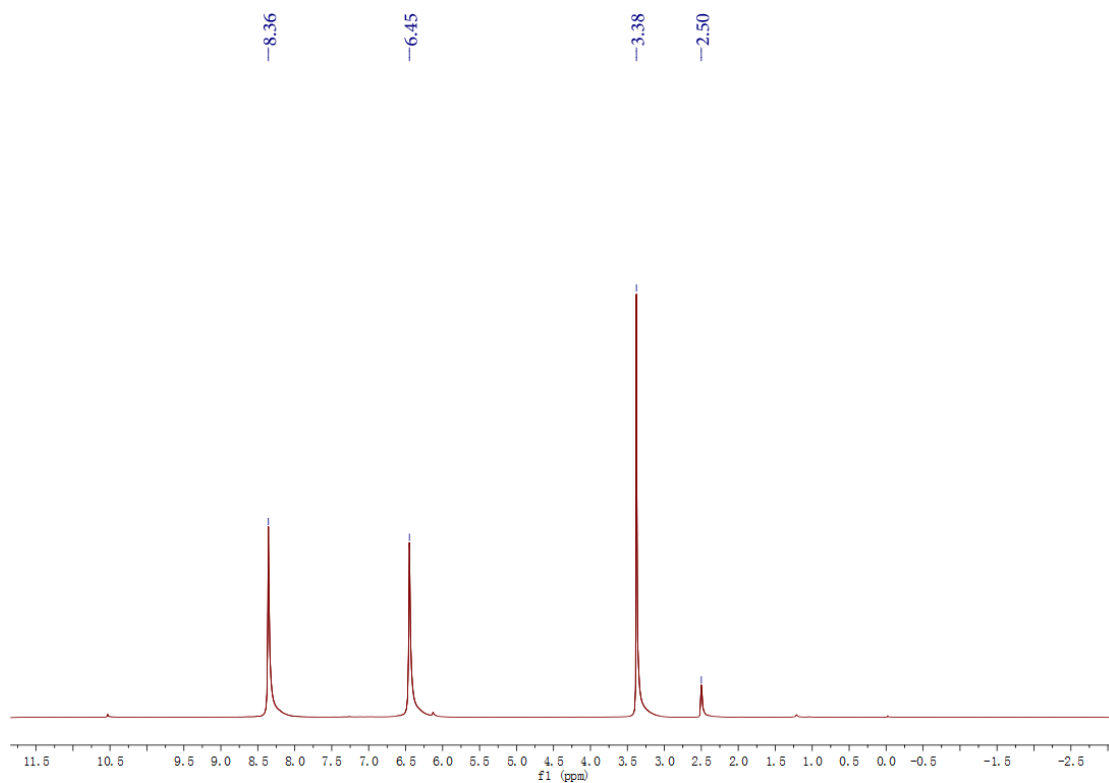

**Figure S3.**  $^1\text{H}$  NMR spectra in  $\text{DMSO-}d_6$  for **4**.

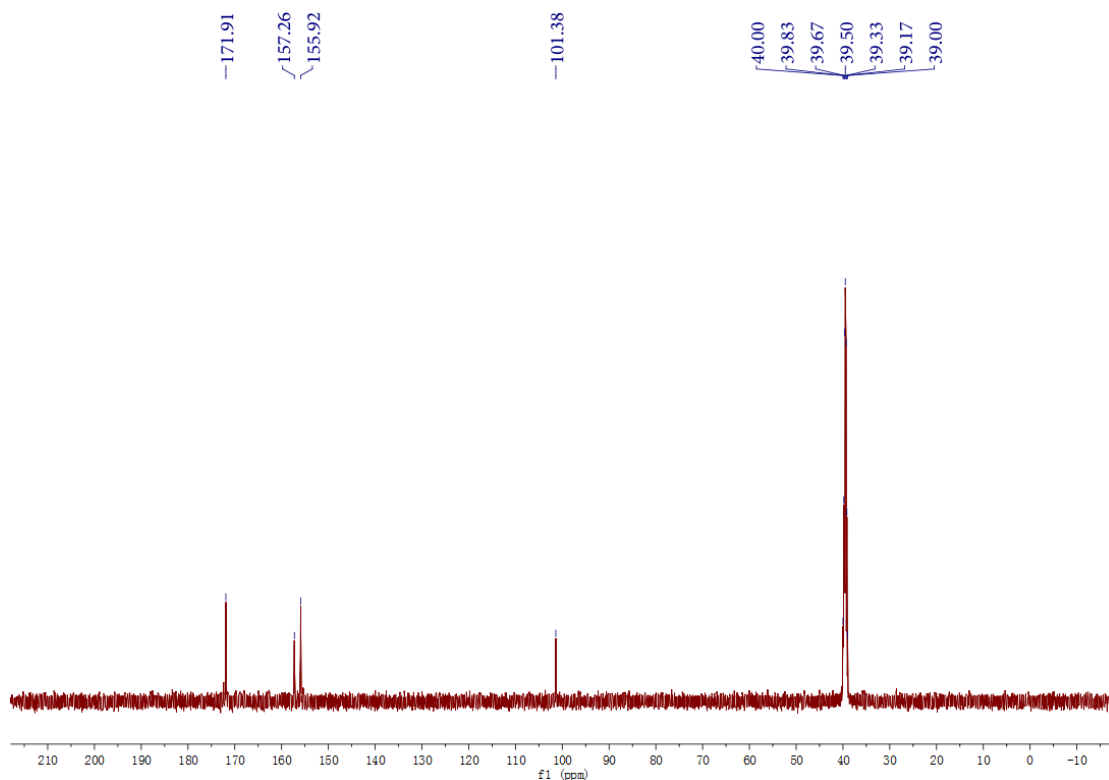

**Figure S4.**  $^{13}\text{C}$  NMR spectra in  $\text{DMSO-}d_6$  for **4**.

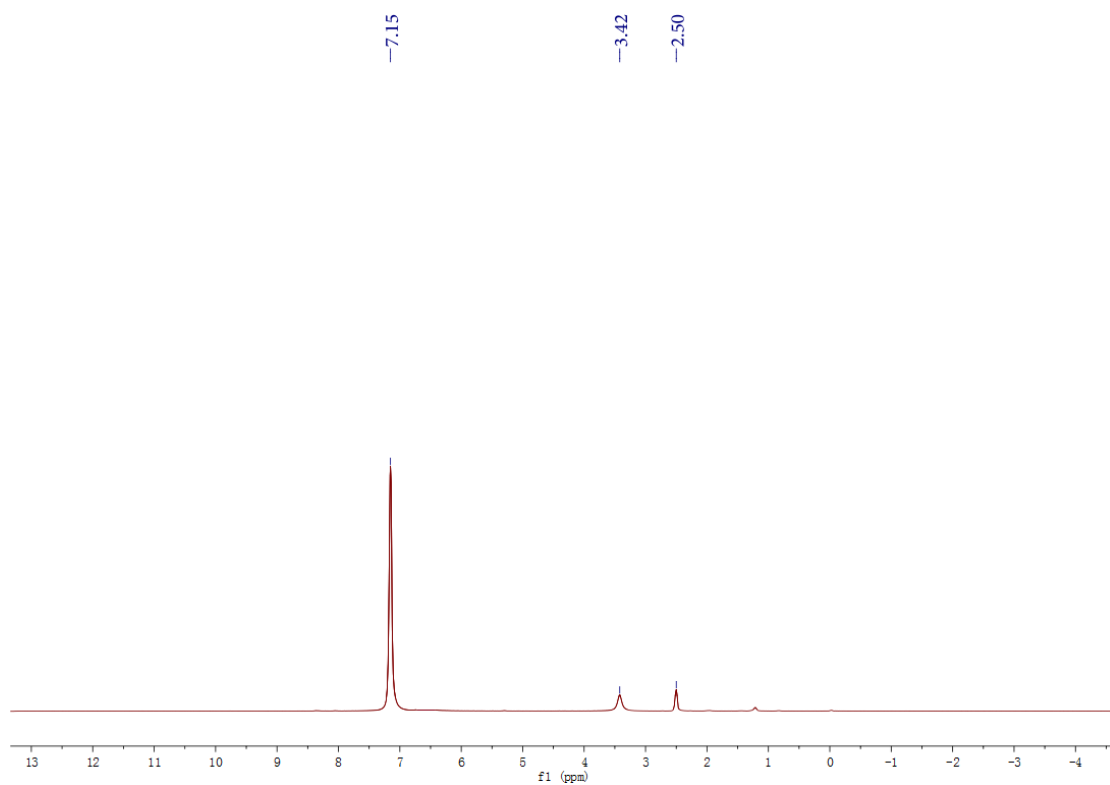

**Figure S5.**  $^1\text{H}$  NMR spectra in  $\text{DMSO-}d_6$  for **5**.

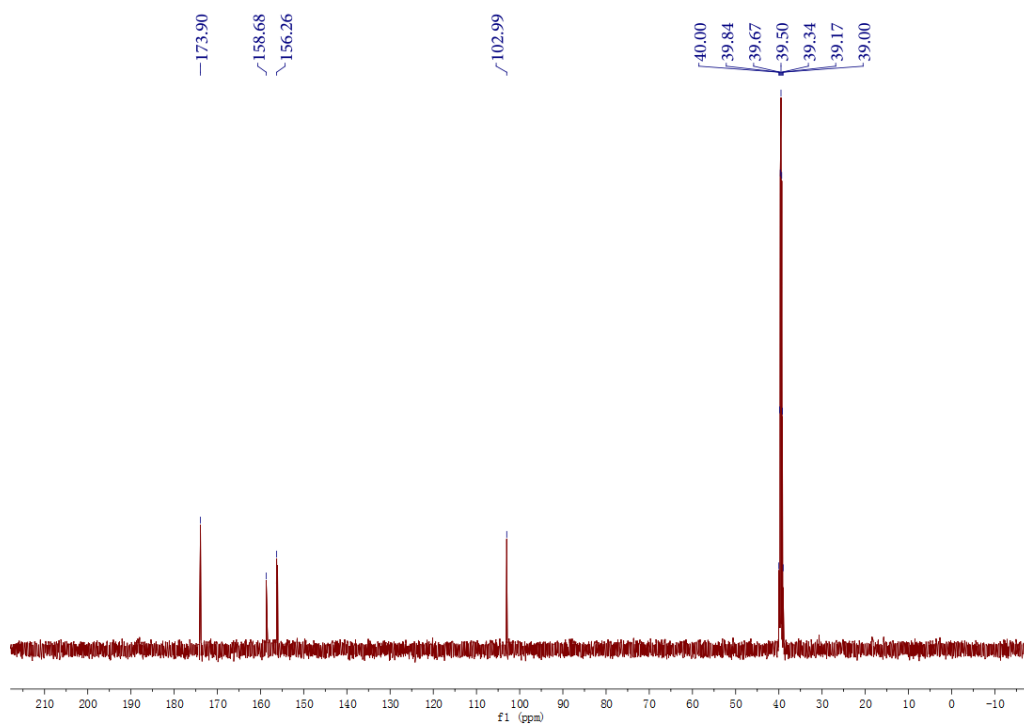

**Figure S6.**  $^{13}\text{C}$  NMR spectra in  $\text{DMSO-}d_6$  for **5**.



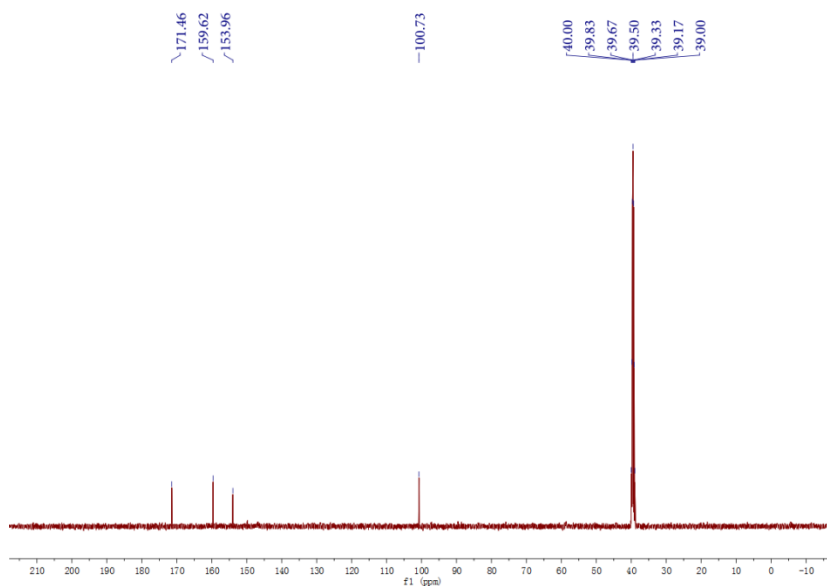

**Figure S7.**  $^{13}\text{C}$  NMR spectra in  $\text{DMSO-}d_6$  for **6**.

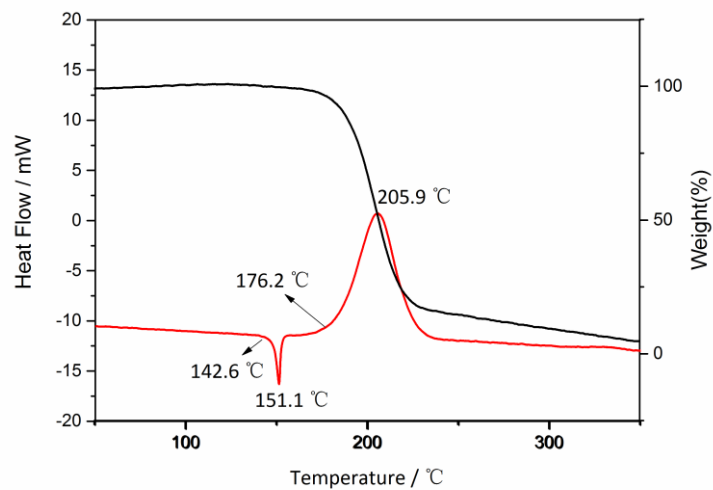

**Figure S8:** TG and DSC curves of **5** measured at a heating rate of  $5\text{ }^\circ\text{C min}^{-1}$  (exo up).

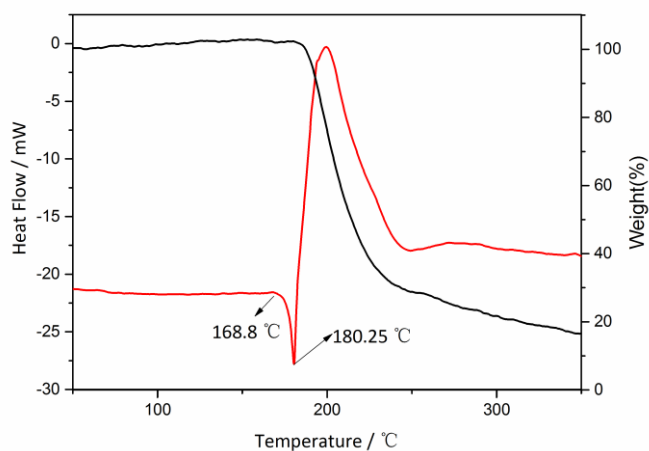

**Figure S9:** TG and DSC curves of **6** measured at a heating rate of  $5\text{ }^\circ\text{C min}^{-1}$  (exo up).

#### 4. References

- [1] M. J. Frisch, et al. Gaussian 09, Revision D. 01 (Gaussian Inc., 2009).
- [2] A. D. Becke, *J. Chem. Phys.* 1993, **98**, 5648-5652
- [3] P. J. Stephens; F. J. Devlin; C. F. Chabalowski; M. J. Frisch. *J. Phys. Chem.* 1994, **98**, 11623-11627.
- [4] P. C. Hariharan; J. A. Pople, *Theor. Chim. Acta.* 1973, **28**, 213-222.
- [5] J. W. Ochterski; G. A. Petersson ; J. A . Montgomery, *J. Chem. Phys.* 1996, **104**, 2598-2619.
